# Supplementary material for: Pentafluorobenzene boronic acid with strong Lewis acidity for the modification of PEO-based polymer electrolytes
Source: Royal Society of Chemistry journal article supplement (doi:10.1039/d3ta06660f), 2024-01-01
Supplement: d3ta06660f1.pdf [file d3ta06660f1.pdf]

Supporting Information (SI)

## Pentafluorobenzene boronic acid with strong Lewis acidity for the modification of PEO-based polymer electrolytes

Liwei Su,<sup>\*a</sup> Yijuan Zhu,<sup>a</sup> Xingyi Zhan,<sup>a</sup> Kang Yu,<sup>a</sup> Ke Gu,<sup>a</sup> Hao Wu,<sup>a</sup> Lianbang  
Wang<sup>\*a</sup>, Yuanhao Wang,<sup>b\*</sup> Xiaoxiang Wang<sup>c</sup>

<sup>a</sup> State Key Laboratory Breeding Base of Green Chemistry-Synthesis Technology,  
College of Chemical Engineering, Zhejiang University of Technology, Hangzhou  
310014, P. R. China

<sup>b</sup> Hoffmann Institute of Advanced Materials, Shenzhen Polytechnic, Shenzhen 518055,  
P. R. China

<sup>c</sup> Anteotech, Queensland 4113, Australia

\*Corresponding author.

E-mail: sulawei@zjut.edu.cn (L. Su); wanglb99@zjut.edu.cn (L. Wang);

wangyuanhao@szpt.edu.cn (Y. Wang)

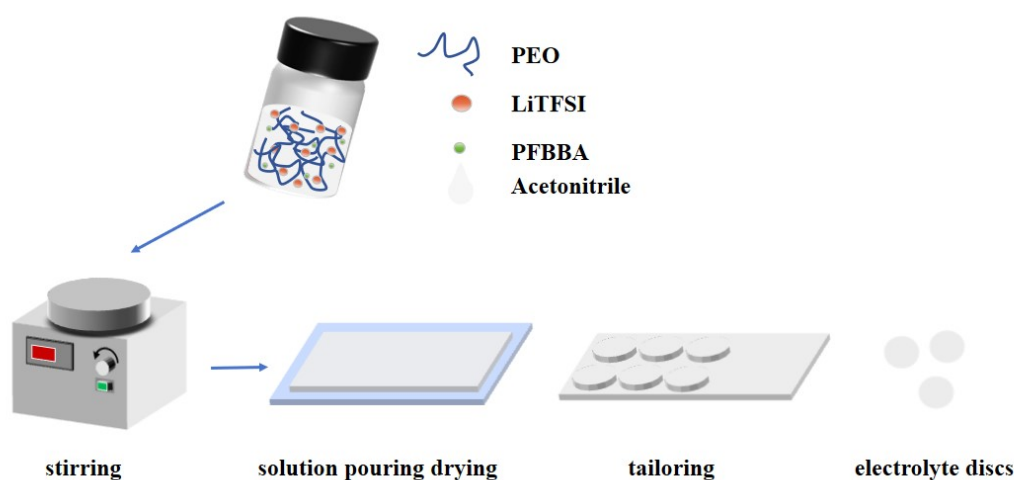

Fig. S1. Diagram of the preparation process of PEO-based SSEs

Table S1. Thermodynamic values and crystallinity of electrolytes

| Electrolytes | T <sub>g</sub> (°C) | T <sub>m</sub> (°C) | ΔH <sub>m</sub> (J g <sup>-1</sup> ) | χ <sub>c</sub> (%) |
|--------------|---------------------|---------------------|--------------------------------------|--------------------|
| Pristine     | -50.44              | 48.60               | 46.86                                | 23.08              |
| 0.5%PFBBA    | -57.41              | 47.76               | 44.53                                | 21.93              |
| 1.0%PFBBA    | -59.76              | 46.55               | 39.99                                | 19.70              |
| 1.5%PFBBA    | -58.90              | 46.96               | 33.39                                | 16.45              |

Table S2. Ionic conductivity (S cm<sup>-1</sup>) of the four electrolytes at different temperatures

| Electrolytes | 30°C                  | 40°C                  | 50°C                  | 60°C                  |
|--------------|-----------------------|-----------------------|-----------------------|-----------------------|
| Pristine     | 8.01×10 <sup>-6</sup> | 1.99×10 <sup>-5</sup> | 5.26×10 <sup>-5</sup> | 1.92×10 <sup>-4</sup> |
| 0.5%PFBBA    | 2.03×10 <sup>-5</sup> | 4.15×10 <sup>-5</sup> | 8.85×10 <sup>-5</sup> | 2.37×10 <sup>-4</sup> |
| 1.0%PFBBA    | 3.09×10 <sup>-5</sup> | 6.68×10 <sup>-5</sup> | 1.56×10 <sup>-4</sup> | 4.58×10 <sup>-4</sup> |
| 1.5%PFBBA    | 1.20×10 <sup>-5</sup> | 2.46×10 <sup>-5</sup> | 5.32×10 <sup>-5</sup> | 1.28×10 <sup>-4</sup> |

Table S3. FT-IR characteristic peaks and the vibration types of functional groups

| Wavenumber/cm <sup>-1</sup> | Chemical bond    | Vibration types             |
|-----------------------------|------------------|-----------------------------|
| 1400-1300                   | -CH <sub>2</sub> | rocking vibration           |
| 990-910                     | -CH <sub>2</sub> | stretching vibration        |
| 1668, 1671                  | -OLi             | /                           |
| 1358, 962                   | B-OH and -O-     | hydrogen bond interaction   |
| 1348                        | B-O              | /                           |
| 1096, 1056                  | C-O-C            | symmetric tensile vibration |

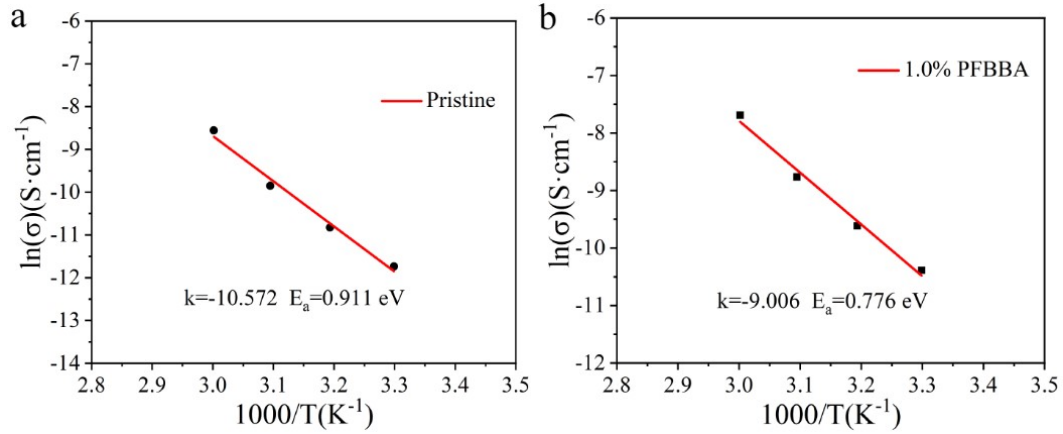

Fig. S2. Arrhenius diagram of electrolytes: (a) Pristine and (b) 1.0% PFBBA

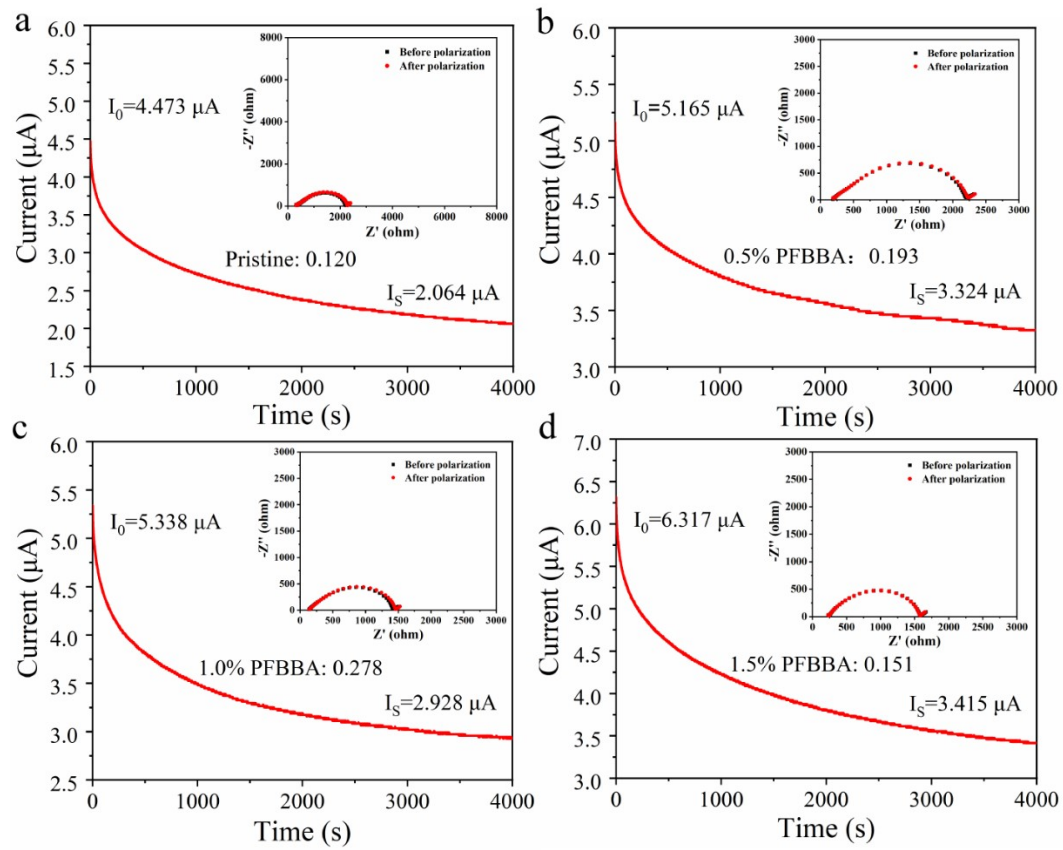

Fig. S3. DC polarization curves and impedance of symmetric Li//Li battery before and after polarization at 30°C: (a) Pristine, (b) 0.5% PFBBA, (c) 1.0% PFBBA, and (d) 1.5% PFBBA

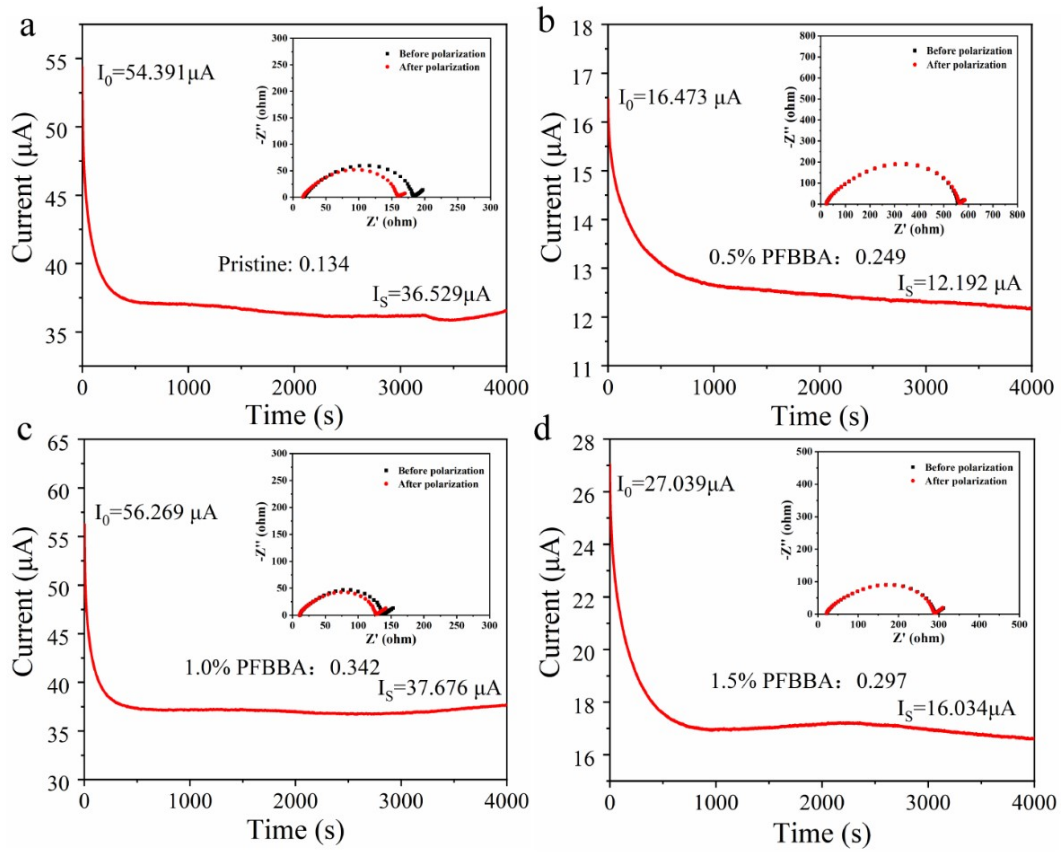

Fig. S4. DC polarization curves and impedance of symmetric Li//Li battery before and after polarization at 60°C: (a) Pristine, (b) 0.5% PFBBA, (c) 1.0% PFBBA, and (d) 1.5% PFBBA

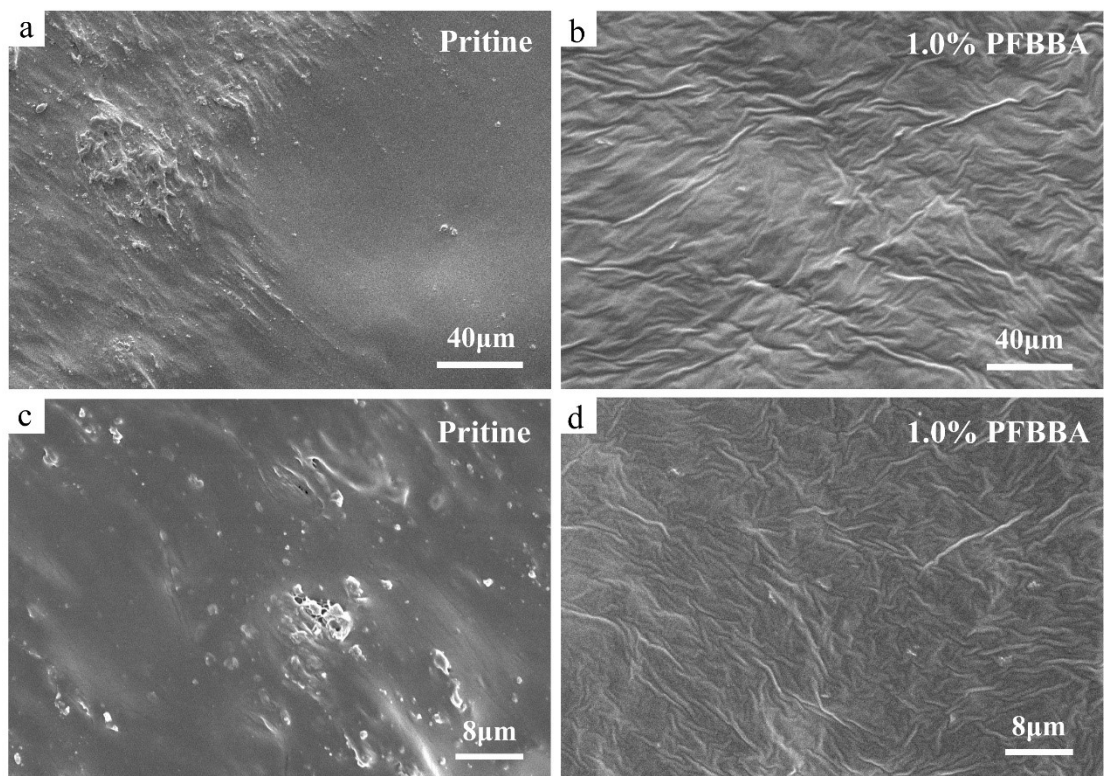

Fig. S5. SEM images of the electrolyte surface exfoliated from the (a, c) Li/Pristine/Li and (b, d) Li/1.0%PFBBA/Li batteries after cycling for 100 h at the current density of  $0.05 \text{ mA cm}^{-2}$

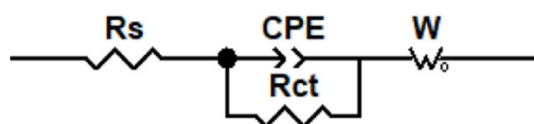

Fig. S6. The equivalent circuit used to fit the EIS plots in Fig. 5, S3, and S4.

Table S4. The interface impedance of Li//Li batteries before and after polarization

| Cycles | Pristine $R_{\text{int}}$ ( $\Omega$ ) | 1.0% PFBBA $R_{\text{int}}$ ( $\Omega$ ) |
|--------|----------------------------------------|------------------------------------------|
| 0      | 1949                                   | 1590                                     |
| 1      | 2821                                   | 1712                                     |
| 5      | 5877                                   | 1861                                     |
| 10     | 3174                                   | 1797                                     |

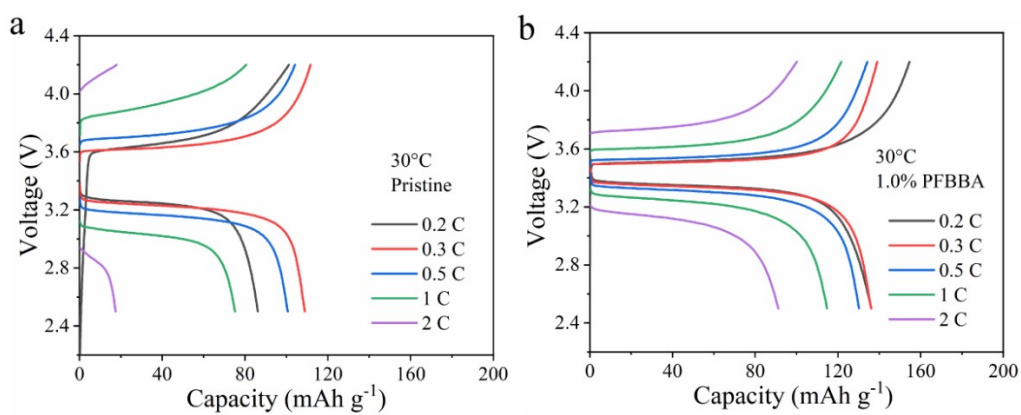

Fig. S7. The charge/discharge curves at different rates of the Li/Pristine/LFP and Li/1.0%PFBBA/LFP full batteries at 30°C

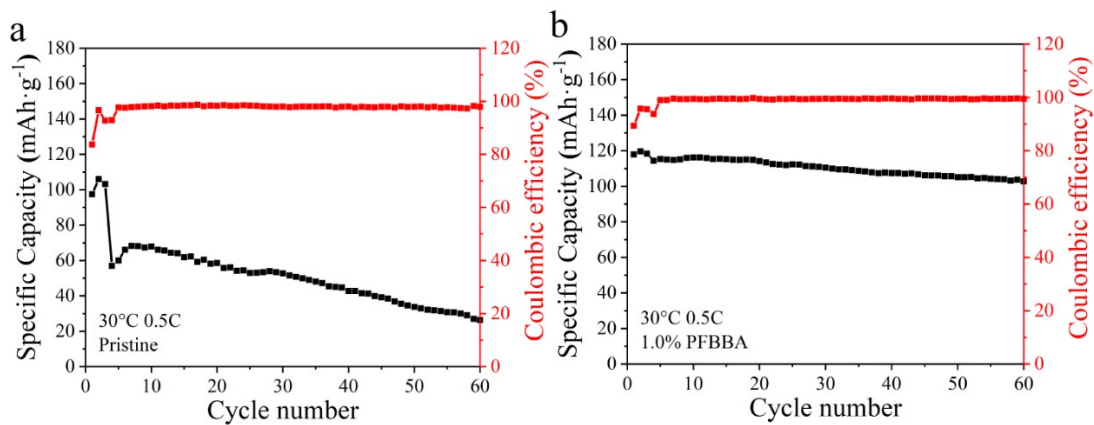

Fig. S8. Cycling performance and Coulombic efficiency of the Li//LiCoO<sub>2</sub> batteries: (a) the Pristine electrolyte and (b) the 1.0%PFBBA electrolyte
